# Supplementary material for: Postadmixture Selection on Chileans Targets Haplotype Involved in Pigmentation, Thermogenesis and Immune Defense against Pathogens
Source: PubMed Central journal article supplement (PMC7487163; doi:10.1093/gbe/evaa136), 2020-07-02
Supplement: evaa136_supplementary_data.pdf [file evaa136_supplementary_data.pdf]

## SUPPLEMENTARY FILES

### Supplementary Figures

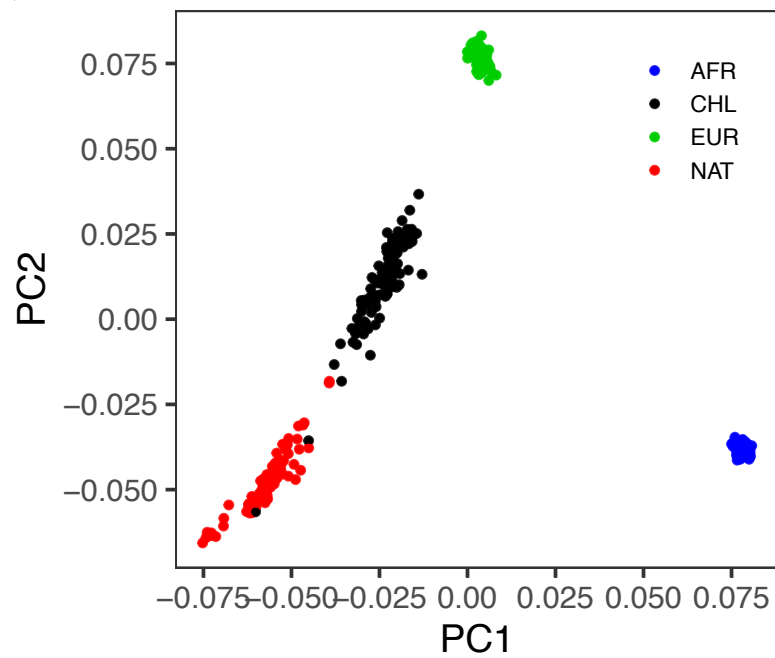

**Supplementary Figure 1. Effect of sample size on PCA from Figure 1A.** PC1 vs PC2 of 99 Chilean individuals together with 99 Europeans (IBS), 99 Native Americans (AYM, QUE, MAY, NAH, MAP) and 99 Africans (YRI).

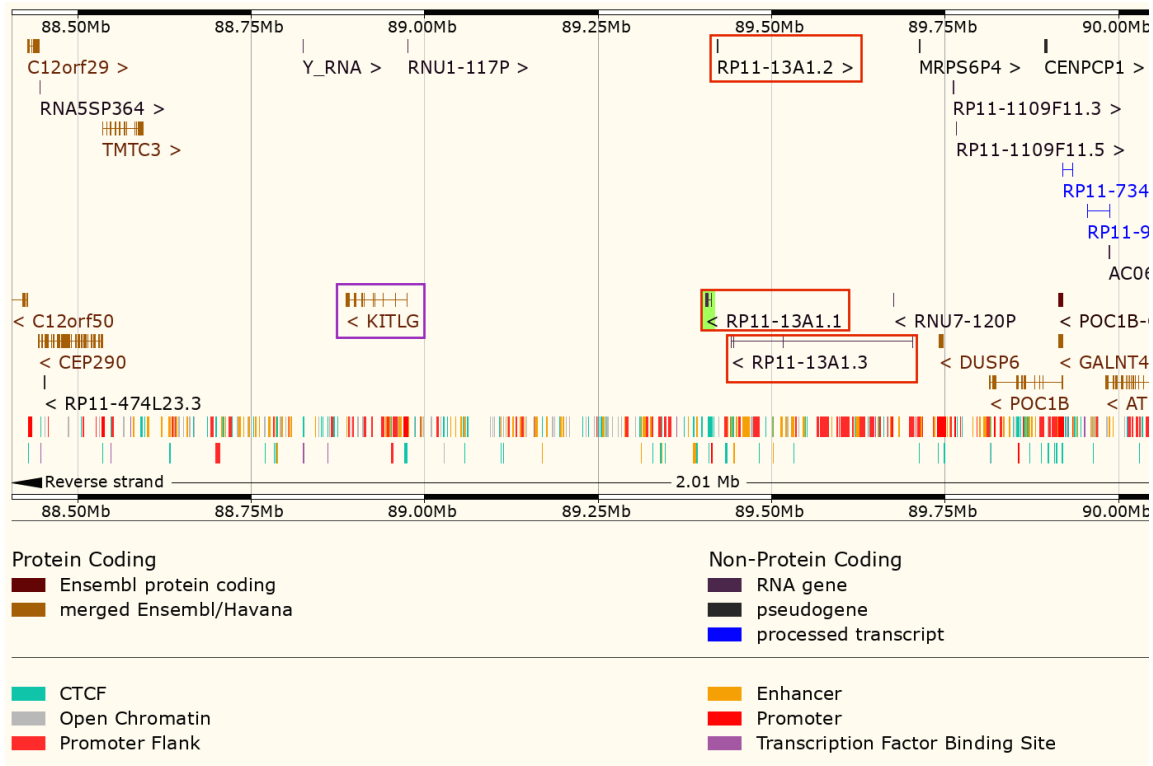

**Supplementary Figure 2. Genetic context of region from chromosome 12 undergoing PAS.** *RP11-13A1.1*, *RP11-13A1.2* and *RP11-13A1.3* are shown within red rectangles. The coordinates of the region under PAS are 12:89193164-89556437. However, we show a broader region to capture the nearby *KITLG* gene (shown within a purple rectangle) as well as other genetic elements. This image was retrieved from Ensembl GRCh37.

## Supplementary Tables

| SNP ID       | POSITION | CHR | EUR ANC | P-VALUE  | CONSEQ | GENE | BIOTYPE  | CADD  |
|--------------|----------|-----|---------|----------|--------|------|----------|-------|
| rs17016050-A | 89193164 | 12  | 0.6486  | 2.40E-07 | IG     | -    | -        | 7.571 |
| rs17016050-T | 89193164 | 12  | 0.6486  | 2.40E-07 | IG     | -    | -        | 6.953 |
| rs11105060-C | 89195117 | 12  | 0.6486  | 2.40E-07 | IG     | -    | -        | 5.129 |
| rs1381908-T  | 89197233 | 12  | 0.6486  | 2.40E-07 | IG     | -    | -        | 1.282 |
| rs11105062-G | 89198983 | 12  | 0.6486  | 2.40E-07 | IG     | -    | -        | 1.852 |
| rs454833-G   | 89200595 | 12  | 0.6486  | 2.40E-07 | IG     | -    | -        | 0.752 |
| rs17016079_A | 89204722 | 12  | 0.6486  | 2.40E-07 | IG     | -    | -        | 1.764 |
| rs1462978-G  | 89204842 | 12  | 0.6486  | 2.40E-07 | IG     | -    | -        | 1.189 |
| rs17016082-A | 89205024 | 12  | 0.6486  | 2.40E-07 | IG     | -    | -        | 0.313 |
| rs1398303-A  | 89205094 | 12  | 0.6486  | 2.40E-07 | IG     | -    | -        | 2.139 |
| rs11105065-C | 89207726 | 12  | 0.6486  | 2.40E-07 | IG     | -    | -        | 0.271 |
| rs11105066-T | 89207924 | 12  | 0.6486  | 2.40E-07 | IG     | -    | -        | 1.503 |
| rs506900-A   | 89224640 | 12  | 0.6486  | 2.40E-07 | IG     | -    | -        | 0.309 |
| rs1512419-A  | 89227133 | 12  | 0.6486  | 2.40E-07 | IG     | -    | -        | 11.21 |
| rs11105077-C | 89235211 | 12  | 0.6486  | 2.40E-07 | IG     | -    | -        | 6.925 |
| rs17016116-A | 89255080 | 12  | 0.6486  | 2.40E-07 | IG     | -    | -        | 1.06  |
| rs10506959-T | 89255723 | 12  | 0.6486  | 2.40E-07 | IG     | -    | -        | 4.764 |
| rs10506960-C | 89255847 | 12  | 0.6486  | 2.40E-07 | IG     | -    | -        | 0.208 |
| rs10506960-T | 89255847 | 12  | 0.6486  | 2.40E-07 | IG     | -    | -        | 0.221 |
| rs11609776-G | 89258855 | 12  | 0.6486  | 2.40E-07 | IG     | -    | -        | 3.219 |
| rs11609776-T | 89258855 | 12  | 0.6486  | 2.40E-07 | IG     | -    | -        | 2.956 |
| rs7298581-A  | 89258874 | 12  | 0.6486  | 2.40E-07 | IG     | -    | -        | 1.708 |
| rs17350615-C | 89259060 | 12  | 0.6486  | 2.40E-07 | IG     | -    | -        | 3.693 |
| rs10858795-C | 89261571 | 12  | 0.6486  | 2.40E-07 | REG    | -    | CTCF_BS  | 1.69  |
| rs10858795-C | 89261571 | 12  | 0.6486  | 2.40E-07 | IG     | -    | -        | 1.69  |
| rs2045808-T  | 89275759 | 12  | 0.6486  | 2.40E-07 | IG     | -    | -        | 1.145 |
| rs1512424-C  | 89292833 | 12  | 0.6486  | 2.40E-07 | IG     | -    | -        | 1.007 |
| rs1512424-G  | 89292833 | 12  | 0.6486  | 2.40E-07 | IG     | -    | -        | 0.858 |
| rs12303900-G | 89299016 | 12  | 0.6486  | 2.40E-07 | IG     | -    | -        | 8.92  |
| rs386799-A   | 89301928 | 12  | 0.6486  | 2.40E-07 | IG     | -    | -        | 1.936 |
| rs386799-C   | 89301928 | 12  | 0.6486  | 2.40E-07 | IG     | -    | -        | 1.338 |
| rs386799-T   | 89301928 | 12  | 0.6486  | 2.40E-07 | IG     | -    | -        | 1.419 |
| rs198639-A   | 89313894 | 12  | 0.6486  | 2.40E-07 | IG     | -    | -        | 1.4   |
| rs198638-C   | 89314180 | 12  | 0.6486  | 2.40E-07 | IG     | -    | -        | 4.414 |
| rs11105106-A | 89315042 | 12  | 0.6486  | 2.40E-07 | REG    | -    | enhancer | 8.189 |
| rs11105106-A | 89315042 | 12  | 0.6486  | 2.40E-07 | IG     | -    | -        | 8.189 |
| rs17815185-A | 89325208 | 12  | 0.6486  | 2.40E-07 | REG    | -    | enhancer | 0.015 |
| rs17815185-T | 89325208 | 12  | 0.6486  | 2.40E-07 | REG    | -    | enhancer | 0.01  |
| rs17815185-A | 89325208 | 12  | 0.6486  | 2.40E-07 | IG     | -    | -        | 0.015 |
| rs17815185-T | 89325208 | 12  | 0.6486  | 2.40E-07 | IG     | -    | -        | 0.01  |
| rs12821256-A | 89328335 | 12  | 0.6486  | 2.40E-07 | REG    | -    | PFR      | 14.72 |
| rs12821256-C | 89328335 | 12  | 0.6486  | 2.40E-07 | REG    | -    | PFR      | 14.8  |
| rs12821256-G | 89328335 | 12  | 0.6486  | 2.40E-07 | REG    | -    | PFR      | 14.69 |
| rs12821256-A | 89328335 | 12  | 0.6486  | 2.40E-07 | REG    | -    | CTCF_BS  | 14.72 |
| rs12821256-C | 89328335 | 12  | 0.6486  | 2.40E-07 | REG    | -    | CTCF_BS  | 14.8  |

| SNP ID       | POSITION | CHR | EUR ANC | P-VALUE  | CONSEQ | GENE        | BIOTYPE  | CADD  |
|--------------|----------|-----|---------|----------|--------|-------------|----------|-------|
| rs12821256-G | 89328335 | 12  | 0.6486  | 2.40E-07 | REG    | -           | CTCF_BS  | 14.69 |
| rs12821256-A | 89328335 | 12  | 0.6486  | 2.40E-07 | TFBS   | -           | -        | 14.72 |
| rs12821256-C | 89328335 | 12  | 0.6486  | 2.40E-07 | TFBS   | -           | -        | 14.8  |
| rs12821256-G | 89328335 | 12  | 0.6486  | 2.40E-07 | TFBS   | -           | -        | 14.69 |
| rs12821256-A | 89328335 | 12  | 0.6486  | 2.40E-07 | IG     | -           | -        | 14.72 |
| rs12821256-C | 89328335 | 12  | 0.6486  | 2.40E-07 | IG     | -           | -        | 14.8  |
| rs12821256-G | 89328335 | 12  | 0.6486  | 2.40E-07 | IG     | -           | -        | 14.69 |
| rs661114-A   | 89337963 | 12  | 0.6486  | 2.40E-07 | REG    | -           | PFR      | 0.186 |
| rs661114-A   | 89337963 | 12  | 0.6486  | 2.40E-07 | IG     | -           | -        | 0.186 |
| rs10858804-G | 89339129 | 12  | 0.6486  | 2.40E-07 | REG    | -           | PFR      | 6.132 |
| rs10858804-G | 89339129 | 12  | 0.6486  | 2.40E-07 | IG     | -           | -        | 6.132 |
| rs12298351-T | 89340112 | 12  | 0.6486  | 2.40E-07 | REG    | -           | PFR      | 17.75 |
| rs12298351-T | 89340112 | 12  | 0.6486  | 2.40E-07 | REG    | -           | CTCF_BS  | 17.75 |
| rs12298351-T | 89340112 | 12  | 0.6486  | 2.40E-07 | IG     | -           | -        | 17.75 |
| rs114873-A   | 89340293 | 12  | 0.6486  | 2.40E-07 | REG    | -           | PFR      | 17.96 |
| rs114873-A   | 89340293 | 12  | 0.6486  | 2.40E-07 | REG    | -           | CTCF_BS  | 17.96 |
| rs114873-A   | 89340293 | 12  | 0.6486  | 2.40E-07 | IG     | -           | -        | 17.96 |
| rs390594-T   | 89345231 | 12  | 0.6486  | 2.40E-07 | REG    | -           | PFR      | 1.01  |
| rs390594-T   | 89345231 | 12  | 0.6486  | 2.40E-07 | IG     | -           | -        | 1.01  |
| rs10161354-G | 89345489 | 12  | 0.6486  | 2.40E-07 | REG    | -           | PFR      | 2.141 |
| rs10161354-G | 89345489 | 12  | 0.6486  | 2.40E-07 | IG     | -           | -        | 2.141 |
| rs11105118-C | 89349282 | 12  | 0.6486  | 2.40E-07 | IG     | -           | -        | 18.94 |
| rs714561-A   | 89354967 | 12  | 0.6486  | 2.40E-07 | REG    | -           | PFR      | 8.265 |
| rs714561-A   | 89354967 | 12  | 0.6486  | 2.40E-07 | IG     | -           | -        | 8.265 |
| rs10858809-G | 89365305 | 12  | 0.6486  | 2.40E-07 | IG     | -           | -        | 8.199 |
| rs2058343-G  | 89366763 | 12  | 0.6486  | 2.40E-07 | IG     | -           | -        | 1.55  |
| rs7969593-A  | 89373308 | 12  | 0.6486  | 2.40E-07 | IG     | -           | -        | 4.689 |
| rs10858811-A | 89381894 | 12  | 0.6486  | 2.40E-07 | IG     | -           | -        | 0.573 |
| rs4842479-T  | 89385017 | 12  | 0.6486  | 2.40E-07 | IG     | -           | -        | 2.155 |
| rs7976001-C  | 89400810 | 12  | 0.6486  | 2.40E-07 | DS     | RP11-13A1.1 | lincRNA  | 8.616 |
| rs1012421-G  | 89425822 | 12  | 0.6486  | 2.40E-07 | DS     | RP11-13A1.2 | PP       | 10.36 |
| rs10858818-C | 89426732 | 12  | 0.6486  | 2.40E-07 | DS     | RP11-13A1.2 | PP       | 0.825 |
| rs12311684-G | 89435177 | 12  | 0.6486  | 2.40E-07 | DS     | RP11-13A1.3 | lincRNA  | 3.563 |
| rs12311684-G | 89435177 | 12  | 0.6486  | 2.40E-07 | REG    | -           | PFR      | 3.563 |
| rs12311684-G | 89435177 | 12  | 0.6486  | 2.40E-07 | REG    | -           | CTCF_BS  | 3.563 |
| rs11611632-T | 89445539 | 12  | 0.6486  | 2.40E-07 | IN-NCT | RP11-13A1.3 | lincRNA  | 1.582 |
| rs11611632-T | 89445539 | 12  | 0.6486  | 2.40E-07 | REG    | -           | CTCF_BS  | 1.582 |
| rs11611632-T | 89445539 | 12  | 0.6486  | 2.40E-07 | REG    | -           | enhancer | 1.582 |
| rs10506961-A | 89462175 | 12  | 0.6486  | 2.40E-07 | IN-NCT | RP11-13A1.3 | lincRNA  | 0.782 |
| rs10506961-A | 89462175 | 12  | 0.6486  | 2.40E-07 | REG    | -           | enhancer | 0.782 |
| rs10506962-C | 89462738 | 12  | 0.6486  | 2.40E-07 | IN-NCT | RP11-13A1.3 | lincRNA  | 5.101 |
| rs10506962-C | 89462738 | 12  | 0.6486  | 2.40E-07 | REG    | -           | enhancer | 5.101 |
| rs10506963-A | 89462969 | 12  | 0.6486  | 2.40E-07 | IN-NCT | RP11-13A1.3 | lincRNA  | 0.708 |
| rs10506963-T | 89462969 | 12  | 0.6486  | 2.40E-07 | IN-NCT | RP11-13A1.3 | lincRNA  | 0.514 |
| rs10506963-A | 89462969 | 12  | 0.6486  | 2.40E-07 | REG    | -           | enhancer | 0.708 |

| SNP ID       | POSITION | CHR | EUR ANC | P-VALUE  | CONSEQ | GENE        | BIOTYPE  | CADD  |
|--------------|----------|-----|---------|----------|--------|-------------|----------|-------|
| rs10506963-T | 89462969 | 12  | 0.6486  | 2.40E-07 | REG    | -           | enhancer | 0.514 |
| rs10777150-C | 89463314 | 12  | 0.6486  | 2.40E-07 | IN-NCT | RP11-13A1.3 | lincRNA  | 4.373 |
| rs10777150-C | 89463314 | 12  | 0.6486  | 2.40E-07 | REG    | -           | enhancer | 4.373 |
| rs12820818-T | 89470891 | 12  | 0.6486  | 2.40E-07 | IN-NCT | RP11-13A1.3 | lincRNA  | 8.421 |
| rs10858822-A | 89471403 | 12  | 0.6486  | 2.40E-07 | IN-NCT | RP11-13A1.3 | lincRNA  | 4.423 |
| rs6538168-A  | 89471844 | 12  | 0.6486  | 2.40E-07 | IN-NCT | RP11-13A1.3 | lincRNA  | 3.398 |
| rs11105167-C | 89471928 | 12  | 0.6486  | 2.40E-07 | IN-NCT | RP11-13A1.3 | lincRNA  | 6.12  |
| rs11105167-C | 89471928 | 12  | 0.6486  | 2.40E-07 | REG    | -           | OCR      | 6.12  |
| rs11105168-C | 89473626 | 12  | 0.6486  | 2.40E-07 | IN-NCT | RP11-13A1.3 | lincRNA  | 3.382 |
| rs11105168-T | 89473626 | 12  | 0.6486  | 2.40E-07 | IN-NCT | RP11-13A1.3 | lincRNA  | 3.48  |
| rs11105170-G | 89475577 | 12  | 0.6486  | 2.40E-07 | IN-NCT | RP11-13A1.3 | lincRNA  | 6.39  |
| rs11105170-G | 89475577 | 12  | 0.6486  | 2.40E-07 | REG    | -           | PFR      | 6.39  |
| rs11105171-G | 89475779 | 12  | 0.6486  | 2.40E-07 | IN-NCT | RP11-13A1.3 | lincRNA  | 1.213 |
| rs11105171-G | 89475779 | 12  | 0.6486  | 2.40E-07 | REG    | -           | PFR      | 1.213 |
| rs12426442-C | 89478882 | 12  | 0.6486  | 2.40E-07 | IN-NCT | RP11-13A1.3 | lincRNA  | 9.616 |
| rs12426442-C | 89478882 | 12  | 0.6486  | 2.40E-07 | REG    | -           | PFR      | 9.616 |
| rs11105173-C | 89487797 | 12  | 0.6486  | 2.40E-07 | IN-NCT | RP11-13A1.3 | lincRNA  | 3.094 |
| rs11834560-T | 89488629 | 12  | 0.6486  | 2.40E-07 | IN-NCT | RP11-13A1.3 | lincRNA  | 0.734 |
| rs1949536-A  | 89490667 | 12  | 0.6486  | 2.40E-07 | IN-NCT | RP11-13A1.3 | lincRNA  | 1.292 |
| rs1879205-C  | 89490962 | 12  | 0.6486  | 2.40E-07 | IN-NCT | RP11-13A1.3 | lincRNA  | 3.384 |
| rs11105174-C | 89492878 | 12  | 0.6486  | 2.40E-07 | IN-NCT | RP11-13A1.3 | lincRNA  | 4.814 |
| rs7962036-T  | 89496725 | 12  | 0.6432  | 7.50E-07 | IN-NCT | RP11-13A1.3 | lincRNA  | 2.199 |
| rs939283-T   | 89497841 | 12  | 0.6432  | 7.50E-07 | IN-NCT | RP11-13A1.3 | lincRNA  | 5.835 |
| rs939284-G   | 89498294 | 12  | 0.6432  | 7.50E-07 | IN-NCT | RP11-13A1.3 | lincRNA  | 0.916 |
| rs939284-T   | 89498294 | 12  | 0.6432  | 7.50E-07 | IN-NCT | RP11-13A1.3 | lincRNA  | 0.822 |
| rs3926062-A  | 89504012 | 12  | 0.6432  | 7.50E-07 | IN-NCT | RP11-13A1.3 | lincRNA  | 9.048 |
| rs11833629-T | 89506544 | 12  | 0.6432  | 7.50E-07 | IN-NCT | RP11-13A1.3 | lincRNA  | 1.607 |
| rs1356774-C  | 89510867 | 12  | 0.6432  | 7.50E-07 | IN-NCT | RP11-13A1.3 | lincRNA  | 6.407 |
| rs1356774-G  | 89510867 | 12  | 0.6432  | 7.50E-07 | IN-NCT | RP11-13A1.3 | lincRNA  | 5.986 |
| rs12369825-T | 89512646 | 12  | 0.6432  | 7.50E-07 | IN-NCT | RP11-13A1.3 | lincRNA  | 1.554 |
| rs1519959-G  | 89515138 | 12  | 0.6432  | 7.50E-07 | IN-NCT | RP11-13A1.3 | lincRNA  | 5.684 |
| rs1519959-G  | 89515138 | 12  | 0.6432  | 7.50E-07 | REG    | -           | enhancer | 5.684 |
| rs17584017-T | 89515681 | 12  | 0.6432  | 7.50E-07 | IN-NCT | RP11-13A1.3 | lincRNA  | 2.308 |
| rs35388619-G | 89520000 | 12  | 0.6432  | 7.50E-07 | IN-NCT | RP11-13A1.3 | lincRNA  | 2.817 |
| rs35388619-G | 89520000 | 12  | 0.6432  | 7.50E-07 | REG    | -           | enhancer | 2.817 |
| rs1519963-A  | 89520977 | 12  | 0.6432  | 7.50E-07 | IN-NCT | RP11-13A1.3 | lincRNA  | 5.163 |
| rs1519963-A  | 89520977 | 12  | 0.6432  | 7.50E-07 | REG    | -           | enhancer | 5.163 |
| rs1983374-A  | 89525052 | 12  | 0.6432  | 7.50E-07 | IN-NCT | RP11-13A1.3 | lincRNA  | 4.082 |
| rs41354950-C | 89527591 | 12  | 0.6432  | 7.50E-07 | IN-NCT | RP11-13A1.3 | lincRNA  | 6.068 |
| rs7138825-A  | 89528992 | 12  | 0.6432  | 7.50E-07 | IN-NCT | RP11-13A1.3 | lincRNA  | 6.813 |
| rs7138825-A  | 89528992 | 12  | 0.6432  | 7.50E-07 | REG    | -           | enhancer | 6.813 |
| rs1996640-A  | 89535861 | 12  | 0.6432  | 7.50E-07 | IN-NCT | RP11-13A1.3 | lincRNA  | 3.787 |
| rs17016437-C | 89535970 | 12  | 0.6432  | 7.50E-07 | IN-NCT | RP11-13A1.3 | lincRNA  | 7.204 |
| rs17352485-A | 89551603 | 12  | 0.6324  | 6.25E-06 | IN-NCT | RP11-13A1.3 | lincRNA  | 0.228 |
| rs17352485-T | 89551603 | 12  | 0.6324  | 6.25E-06 | IN-NCT | RP11-13A1.3 | lincRNA  | 0.316 |

| SNP ID       | POSITION | CHR | EUR ANC | P-VALUE  | CONSEQ | GENE        | BIOTYPE | CADD  |
|--------------|----------|-----|---------|----------|--------|-------------|---------|-------|
| rs7957097-A  | 89553345 | 12  | 0.6324  | 6.25E-06 | IN-NCT | RP11-13A1.3 | lincRNA | 0.26  |
| rs7957097-T  | 89553345 | 12  | 0.6324  | 6.25E-06 | IN-NCT | RP11-13A1.3 | lincRNA | 0.185 |
| rs1356773-A  | 89555278 | 12  | 0.6324  | 6.25E-06 | IN-NCT | RP11-13A1.3 | lincRNA | 3.056 |
| rs1356773-C  | 89555278 | 12  | 0.6324  | 6.25E-06 | IN-NCT | RP11-13A1.3 | lincRNA | 3.335 |
| rs11105194-T | 89556437 | 12  | 0.6324  | 6.25E-06 | IN-NCT | RP11-13A1.3 | lincRNA | 3.631 |

**Supplementary Table 1. Variants with enrichment in mean local European ancestry.** Variants with significant deviations in the mean local European ancestry over the genome-wide mean among admixed Chileans. Shown are the corresponding SNP ID, physical position, chromosome, mean European local ancestry, *P*-value of the *t*-test, SO consequence type, associated gene, biotype and CADD-PHRED score. Abbreviations: CTCF-BS: CTCF binding site; IG: intergenic; DS: downstream; IN: intron; IN-NCT: intron/non-coding transcript; lincRNA: long noncoding RNA; OCR: open chromatin region; PP: processed pseudogene; REG: regulatory region; TFBS: transcription factor binding site. Shown are consequence types per variant allele.

| <b>N</b> | <b>Ne</b> | <b>T</b> | <b>Mean</b> | <b>Var</b> | <b>Min</b> | <b>Max</b> | <b>P-Value</b> |
|----------|-----------|----------|-------------|------------|------------|------------|----------------|
| 93       | 4,500     | 10       | 0.5033      | 0.0028     | 0.2541     | 0.654      | 0.00674        |
| 185      | 4,500     | 10       | 0.4951      | 0.0027     | 0.2796     | 0.624      | 0.02506        |
| 185*     | 4,500     | 10       | 0.4938      | 0.0023     | 0.3162     | 0.665      | 0.00159        |
| 370      | 4,500     | 10       | 0.4962      | 0.0022     | 0.3581     | 0.628      | 0.01185        |
| 93       | 6,000     | 12       | 0.5272      | 0.0015     | 0.4162     | 0.638      | 0.00184        |
| 185      | 6,000     | 12       | 0.5294      | 0.0016     | 0.4140     | 0.667      | 0.00018        |
| 185*     | 6,000     | 12       | 0.5161      | 0.0009     | 0.4351     | 0.649      | 0.00002        |
| 370      | 6,000     | 12       | 0.5179      | 0.0005     | 0.4473     | 0.596      | 0.00068        |
| 93       | 7,000     | 15       | 0.5211      | 0.0015     | 0.4054     | 0.686      | 0.00002        |
| 185      | 7,000     | 15       | 0.5246      | 0.0018     | 0.3978     | 0.677      | 0.00017        |
| 185*     | 7,000     | 15       | 0.5216      | 0.0010     | 0.4135     | 0.630      | 0.00041        |
| 370      | 7,000     | 15       | 0.5254      | 0.0007     | 0.4311     | 0.615      | 0.00015        |

**Supplementary Table 2. Local European ancestry deviations under simulations of neutral evolution.** Effect of sample size  $N$  (number of haploid chromosomes), effective population size  $Ne$  and time  $T$  since admixture (in number of generations) on local EUR ancestry deviations over the genome-wide EUR ancestry mean. Besides sexual populations labeled with an asterisk, all other simulated populations are hermaphroditic. Shown are the mean, variance, minimum and maximum of EUR ancestry for the locus exhibiting the highest deviation under each combination of  $N$ ,  $Ne$  and  $T$ , as well as the corresponding t-test  $P$ -value.
